1 **Development of migrating entheses involves replacement of progenitor populations**

2 Neta Felsenthal<sup>1</sup>, Sarah Rubin<sup>1</sup>, Tomer Stern<sup>1</sup>, Sharon Krief<sup>1</sup>, Deepanwita Pal<sup>2</sup>, Brian A. Pryce<sup>2</sup>, Ronen  
3 Schweitzer<sup>2</sup> and Elazar Zelzer<sup>1</sup>

4

5 <sup>1</sup> Department of Molecular Genetics, Weizmann Institute of Science, Rehovot 76100, Israel

6 <sup>2</sup> Research Division, Shriners Hospital for Children, Portland, OR 97201, USA

7

8 Corresponding author: [eli.zelzer@weizmann.ac.il](mailto:eli.zelzer@weizmann.ac.il)

9

10

11 Keywords: Musculoskeletal development, Enthesis, Sox9, Gli1, Progenitor cell, Hedgehog signaling,

12 R26R-Confetti

13

14 **ABSTRACT**

15 Attachment sites of tendons to bones, called entheses, are essential for proper musculoskeletal function.  
16 They are formed embryonically by *Sox9*<sup>+</sup> progenitors and undergo a developmental process that  
17 continues into the postnatal period and involves *Gli1* lineage cells. During bone elongation, some  
18 entheses maintain their relative positions by actively migrating along the bone shaft, while others,  
19 located at the bone's extremities, remain stationary. Despite their importance, we lack information on  
20 the developmental transition from embryonic to mature enthesis and on the relation between *Sox9*<sup>+</sup>  
21 progenitors and *Gli1* lineage cells. Here, by performing a series of lineage tracing experiments, we  
22 identify the onset of *Gli1* lineage contribution to different entheses during embryogenesis. We show that  
23 *Gli1* expression is regulated by SHH signaling during embryonic development, whereas postnatally it is  
24 maintained by IHH signaling. Interestingly, we found that unlike in stationary entheses, where *Sox9*<sup>+</sup>  
25 cells differentiate into the *Gli1* lineage, in migrating entheses the *Sox9* lineage is replaced by *Gli1*  
26 lineage and do not contribute to the mature enthesis. Moreover, we show that these *Gli1*<sup>+</sup> progenitors  
27 are pre-specified embryonically to form the different cellular domains of the mature enthesis.  
28 Overall, these findings demonstrate a developmental strategy whereby one progenitor population  
29 establishes a simple, embryonic tissue, whereas another population is responsible for its maturation into  
30 a complex structure during its migration. Moreover, they suggest that different cell populations may be  
31 considered for cell-based therapy of enthesis injuries.

32

33

## 34 INTRODUCTION

35 The proper assembly of the musculoskeletal system is essential for the function, form and stability of the  
36 organism. During embryogenesis, an attachment between tendon and bone, known as enthesis, is  
37 formed. Thereafter and into the postnatal period, the rudimentary enthesis further develops into a more  
38 complex tissue. While some knowledge on enthesis formation and maturation exists, far less is known  
39 about the processes that transform the simple embryonic enthesis into the structure of the mature  
40 enthesis.

41 Traditionally, entheses are divided to either fibrous or fibrocartilaginous, according to their composition.  
42 Fibrous entheses form at the attachment site of a tendon that is inserted directly into the bone shaft,  
43 forming a structure that resembles a root system. This structure, which is composed of a dense  
44 connective tissue (Doschak and Zernicke, 2005; Shaw and Benjamin, 2007; Wang et al., 2013), was  
45 shown to be regulated by parathyroid hormone-like hormone (PTHrP, also known as PTHrP) (Wang et  
46 al., 2013). Fibrocartilage entheses typically form at attachment sites of tendons to the epiphysis or to  
47 bone eminences. Relative to fibrous entheses, fibrocartilage entheses are structurally more complex,  
48 displaying a cellular gradient that is typically divided into four zones, namely tendon, fibrocartilage,  
49 mineralized fibrocartilage and bone. The graded tissue that develops postnatally dissipates the stress that  
50 forms at the attachment site, thereby providing the enthesis with the mechanical strength necessary to  
51 withstand compression (Benjamin et al., 2006).

52 Enthesis development is initiated by the specification of a specialized pool of progenitor cells that  
53 express both SRY-box 9 (*Sox9*), a key regulator of chondrogenesis, and the tendon marker scleraxis  
54 (*Scx*) (Akiyama et al., 2005; Blitz et al., 2013; Schweitzer et al., 2001; Sugimoto et al., 2013). Cell  
55 lineage studies showed that *Sox9*-expressing progenitor cells contribute to the formation of the enthesis  
56 in neonatal mice (Akiyama et al., 2005; Soeda et al., 2010). Another marker for enthesis cells is GLI-

57 Kruppel family member *GLI1* (*Gli1*), a component of the hedgehog (HH) signaling pathway. Lineage  
58 studies revealed that *Gli1*-expressing cells act as progenitors that contribute to the formation of some  
59 adult entheses (Dyment et al., 2015; Schwartz et al., 2015). However, the relation between progenitors  
60 of the embryonic enthesis and *Gli1* lineage cells, which contribute to the mature enthesis, has not been  
61 determined.

62 The relative position of an enthesis along the bone directly affects its mechanical function and,  
63 subsequently, the animal's mobility (Polly, 2007; Salton and Sargis, 2009). Recently, it was shown that  
64 all entheses maintain their relative position during bone elongation (Stern et al., 2015). The mechanism  
65 that maintains their positions involves regulation of the relative growth rates at the two epiphyseal  
66 plates. Additionally, some entheses migrate through continuous reconstruction to maintain their position,  
67 a process known as bone modelling or drift (Benjamin and McGonagle, 2009; Dörfl, 1980a; Dörfl,  
68 1980b). These entheses, referred to in the following as migrating entheses, face a unique developmental  
69 challenge. Unlike most organs and tissues, they must develop into a complex graded tissue while  
70 constantly drifting. This raises the question of whether the descendants of the embryonic enthesis  
71 progenitors continue to serve as the building blocks during maturation of migrating entheses.

72 In this work, we identify the embryonic stage at which *Gli1* lineage is initiated and demonstrate its  
73 contribution to the postnatal enthesis. We show that embryonic *Gli1* expression is initially under the  
74 regulation of SHH. Later during postnatal development, *Gli1* expression is maintained by IHH.  
75 Moreover, we show that *Sox9* lineage does not contribute to postnatal migrating entheses. Instead, *Gli1*  
76 lineage cells replace the *Sox9* lineage cells and populate the enthesis. Finally, we show that embryonic  
77 *Gli1* lineage cells are pre-determined to contribute to the different layers of the fibrocartilaginous  
78 enthesis.

79



## 80 **RESULTS**

### 81 **Some entheses undergo cellular and morphological changes while migrating**

82 The development of the rudimentary embryonic attachment site into the complex structure of a mature  
83 enthesis has received little attention (Galatz et al., 2007). As mentioned, in addition to substantial  
84 cellular and morphological changes, some entheses also migrate considerably along the bone during  
85 bone growth (Benjamin and McGonagle, 2009; Dörfl, 1980a; Dörfl, 1980b; Stern et al., 2015).  
86 Therefore, to study the transition that migrating entheses undergo during maturation, we documented  
87 morphological and molecular changes as well as drifting activity in entheses from embryonic day (E)  
88 14.5 to postnatal day (P) 14. We focused on two migrating entheses, namely the deltoid enthesis (DT), a  
89 fibrocartilaginous enthesis that forms between the deltoid tendon and the deltoid tuberosity, and the teres  
90 major enthesis (TM), a fibrous enthesis that forms between the teres major tendon and the humeral shaft.  
91 Analysis of enthesis positions during development revealed that both DT ( $0.778\pm 0.026$  mm) and TM  
92 ( $1.624\pm 0.171$  mm) entheses drifted considerably along the bone shaft during bone elongation (Fig. 1A).  
93 Histological sections through wild-type (WT) mouse humeri showed that both embryonic entheses  
94 displayed a simple structure of layered cells (Fig. 1B,C(a),D(a)). However, the overall shape of the  
95 enthesis dramatically changed through development, as it protruded outwards from the bone shaft and  
96 the different enthesis domains became more noticeable (Fig. 1C(a'-a'''),D(a'-a''')). Tissue complexity  
97 also increased, as a larger variety of cells, such as fibrocartilage cells and osteoblasts (Benjamin and  
98 McGonagle, 2009), were identified along with an increase in extracellular matrix (Fig. 1C(d,d',h,h'),  
99 D(d,d',h,h')). The increased complexity was also demonstrated by a change in the expression patterns of  
100 structural genes, such as bone sialoprotein (*Bsp*; also known as integrin binding sialoprotein (*Ibsp*),  
101 collagen type 2 alpha 1 (*Col2a1*), collagen type 12 alpha 1 (*Coll2a1*) and tenascin C (*Tnc*), and  
102 regulatory genes such as *Gli1*. Furthermore, expression domains correlating to various structural

103 domains emerged, namely *Coll2a1*, *Tnc*, *Gli1* and *Colla1* in tendon and fibrocartilage (Fig. 1C(c,f-  
104 h),D(c,f-h), and *Colla1*, *Gli1* and *Bsp* in mineralized fibrocartilage and bone (Fig. 1C(c,e,h),D(c,e,h)).

105

### 106 ***Gli1*+ cell lineage contributes to the postnatal enthesis**

107 Previously, lineage tracing experiments showed that *Gli1* lineage cells contribute to postnatal enthesis  
108 development (Dyment et al., 2015; Schwartz et al., 2015). Yet, the onset of this lineage during  
109 embryogenesis and its dynamics in different entheses have been missing. In order to identify the onset of  
110 *Gli1* lineage, we performed pulse-chase experiments on *Gli1-CreER<sup>T2</sup>* (Ahn & Joyner, 2004) mice  
111 crossed with *R26R-tdTomato* reporter mice (Madisen et al., 2010), which allowed us to mark *Gli1*  
112 expressing cells at specific time points and follow their descendants. We analyzed three entheses  
113 representing different types, namely DT (migratory-fibrocartilaginous), TM (migratory-fibrous), and  
114 Achilles (stationary-fibrocartilaginous). Examination of neonatal (P0) TM and DT entheses following  
115 tamoxifen administration at E11.5 and E12.5 revealed only a few *Gli1* lineage cells. However,  
116 administration at E13.5 and E15.5 resulted in extensive labeling in both entheses (Fig. 2A-A''',B-B''').  
117 In the stationary Achilles enthesis, extensive labeling was observed at P0 only after tamoxifen  
118 administration at E15.5 (Fig. 3C'''). The postnatal contribution of *Gli1* lineage to migratory entheses  
119 was further established by following E13.5 lineage induction to P14 (Fig. 2D,E).

120 Together, these results indicate that although *Gli1* lineage is not induced at the onset of enthesis  
121 formation (Blitz et al., 2013; Sugimoto et al., 2013), it contributes differentially to different entheses  
122 during embryonic development.

123

### 124 ***Gli1* expression in migrating entheses is initiated by SHH and maintained by IHH**

125 The Hedgehog (HH) signaling pathway has previously been suggested to play a role in regulating the  
126 activity of *Gli1*-positive enthesis cells (Breidenbach et al., 2015; Dymment et al., 2015; Liu et al., 2013;  
127 Schwartz et al., 2015). Thus, our finding that *Gli1* expression is initiated at early stages of enthesis  
128 development (Fig. 1C(h)D(h)) raised the question of which component of the HH pathway regulates  
129 *Gli1* expression in enthesis cells and whether it also affects migratory entheses. It was suggested that  
130 Indian hedgehog (IHH), an effector of the HH signaling pathway, is a possible regulator of *Gli1* lineage  
131 cells in adult stationary entheses. In order to examine the possible role of IHH in inducing *Gli1*  
132 expression in the embryonic enthesis, we blocked *Ihh* expression in the limb by using *Prx1-Cre-Ihh*<sup>-/-</sup>  
133 mice. Interestingly, at E14.5 *Gli1* was expressed in control and mutant entheses, suggesting that *Gli1*  
134 expression in embryonic enthesis progenitors is not regulated by *Ihh* (Fig. 3A,A'). We therefore  
135 examined the possible role of another regulator of HH signaling, namely sonic hedgehog (SHH), by  
136 analyzing *Gli1* expression by embryonic enthesis cells in *Shh* KO embryos (*Shh-GFPCre*<sup>-/-</sup>). Results  
137 showed that *Gli1* expression dramatically decreased in the mutant entheses compared to the WT (Fig.  
138 3B,B'), suggesting that SHH is necessary for the induction of *Gli1* in embryonic enthesis cells.  
139 That result was intriguing, because we observed that *Gli1* was constantly expressed by both embryonic  
140 and postnatal enthesis cells (Fig. 1A(h-h'''),B(h-h''')), while *Shh* is expressed in the limb only during  
141 embryogenesis (Harfe et al., 2004). This raised the question of how *Gli1* expression in the enthesis is  
142 maintained after the loss of *Shh* expression. To address the possibility that *Ihh* controls *Gli1* expression  
143 in the postnatal enthesis even though it is not involved in the induction of *Gli1* expression in embryonic  
144 enthesis progenitors, we analyzed *Prx1-Cre-Ihh*<sup>-/-</sup> mice at P10. Results showed that although *Gli1*  
145 expression was maintained in mutant muscle and bone, in the enthesis it was completely lost (Fig.  
146 3C,C'), indicating that *Ihh* is indeed required for the maintenance of *Gli1* expression in enthesis cells.  
147 To identify the source of *Ihh* in the enthesis, we performed immunofluorescence staining for IHH

148 protein in P6 enthesis sections. As seen in Figure 3 (D,D'), IHH was highly expressed in mineralized  
149 fibrocartilage and bone regions at the enthesis center.

150 Taken together, these results suggest that *Gli1* expression by embryonic enthesis progenitors is induced  
151 by SHH and later, in the maturing enthesis, maintained by IHH originating in mineralized fibrocartilage  
152 and bone.

153

#### 154 ***Sox9* lineage cells of the embryonic enthesis do not contribute to postnatal migrating entheses**

155 The embryonic enthesis originates from *Scx/Sox9* double-positive progenitor cells (Blitz et al., 2013;  
156 Sugimoto et al., 2013). Yet, the contribution of these progenitors to the postnatal enthesis and their  
157 relation to the *Gli1* lineage cells have never been studied. To fill this gap, we first examined the  
158 contribution of *Sox9* lineage to the postnatal enthesis. To that end, we performed a pulse-chase cell  
159 lineage experiment using mice that express Cre-ER under control of the *Sox9* promoter (*Sox9-CreER<sup>T2</sup>*)  
160 crossed with *R26R-tdTomato* reporter mice (Soeda et al., 2010). It was previously demonstrated that  
161 tamoxifen administration at E12.5 effectively labels embryonic enthesis cells (Blitz et al., 2013; Soeda  
162 et al., 2010). Indeed, examination at P0 following tamoxifen administration at E12.5 showed that the  
163 DT, TM and Achilles entheses were populated by tdTomato-positive cells, suggesting that at that stage,  
164 the enthesis is populated by *Sox9* lineage cells (Fig. 4A(a,b,d)). Yet, surprisingly, at P14 we observed a  
165 dramatic decrease in the contribution of tdTomato-expressing cells to the two migrating entheses (Fig.  
166 4A(a',b',c), although the cells in the stationary enthesis were still extensively labeled (Fig. 4A(d')).  
167 These results suggest that postnatal stationary enthesis cells were descendants of the *Sox9*-positive  
168 embryonic lineage, whereas in migrating entheses this lineage was lost.

169 The labeled stationary entheses could serve as a positive internal control for the effectiveness of  
170 labeling. Nevertheless, to rule out the possibility that tamoxifen was administered at the wrong time

171 point, we repeated the experiment while administering tamoxifen at different time points from E11.5 to  
172 E17.5 (Fig. 4B). Examination at P14 showed minimal contribution of *Sox9* lineage cells to the postnatal  
173 entheses, similar to the results obtained following pulsing at E12.5. Taken together, these results indicate  
174 that the embryonic *Sox9* lineage contributes poorly to postnatal migrating entheses, suggesting that these  
175 entheses are populated by another cell lineage postnatally.

176

### 177 ***Gli1* lineage cells replace the embryonic *Sox9* lineage during entheses maturation**

178 Our finding that both embryonic *Gli1* and *Sox9* lineages contribute to the stationary postnatal entheses  
179 suggests that these two genes mark a common cell lineage. Conversely, the finding that embryonic *Sox9*  
180 lineage contributes to embryonic but not to postnatal migrating entheses implies that postnatally,  
181 embryonic *Gli1* lineage replaces the *Sox9* lineage to form the mature entheses.

182 To study the process of lineage replacement and to follow its dynamics, we traced both lineages  
183 throughout entheses development, from E15.5 to maturation at P14, by pulse-chase experiments. As seen  
184 in Figure 5, at E15.5 and P0 in both the DT and TM, *Sox9* lineage cells populated the embryonic  
185 entheses. However, from P0 their number decreased dramatically and by P8, the entheses contained only  
186 a limited number of these cells. Concurrently, the number of cells of the *Gli1* lineage gradually  
187 increased in both entheses and, by P8, *Gli1*<sup>+</sup> cells inhabited most of the entheses structure. Interestingly,  
188 the gradual population of the DT and TM entheses by *Gli1* lineage cells correlated with the temporal  
189 dynamics of entheses migration (Fig. 1A). These results support our hypothesis that during early  
190 postnatal development of migrating entheses, a new population derived from *Gli1*-positive progenitors  
191 substitutes the *Sox9* lineage cells of the embryonic entheses.

192

### 193 **Cell fate of *Gli1*-positive progenitors is predetermined**

194 The increasing cellular complexity of the developing enthesis and our finding that progenitors of the  
195 *Gli1* lineage that will contribute to the postnatal enthesis are present already during embryonic  
196 development led us to ask how these cells form the graded tissue of the mature enthesis. Specifically, we  
197 sought to determine whether *Gli1* lineage cells possess a multipotent capacity and, thereby, produce the  
198 different cell types of the various enthesis domains, or have predetermined cell fates already at the time  
199 of their recruitment to the embryonic enthesis. To decide between these options, we conducted pulse-  
200 chase experiments on *Gli1-CreER<sup>T2</sup>* mice crossed with *R26R-Confetti* mice (Snippert et al., 2010) that,  
201 upon recombination, stochastically express GFP, RFP, CFP or YFP, allowing for the identification of  
202 different cell clones. Clones derived from multipotent progenitors would be spread among the different  
203 domains, whereas predetermined progenitors would produce clones that are confined to specific  
204 domains.

205 We focused on the two main domains of the DT enthesis, namely mineralized and non-mineralized  
206 fibrocartilage, and on the border between enthesal mesenchymal cells and bone in the TM enthesis.  
207 Examination of P14 limbs following tamoxifen administration at E13.5 revealed multiple clones in both  
208 entheses, most of which were restricted to a specific domain (Fig. 6). These results suggest that at E13.5,  
209 the cell fates of *Gli1* lineage progenitors have already been determined.

210

211

212

## 213 **DISCUSSION**

214 The transition from the embryonic to the mature enthesis has been understudied. Here, we use genetic  
215 lineage tracing to unravel the cellular developmental sequence of fibrous and fibrocartilaginous  
216 entheses. We show that although *Gli1*<sup>+</sup> progenitors contribute to entheses of both types, their

217 contribution differ greatly between stationary and migratory entheses. In stationary entheses, *Gli1*+  
218 progenitors are descendants of *Sox9*+ progenitors that have established the embryonic enthesis.  
219 However, in migrating entheses, a separate, pre-specified population of *Gli1*+ progenitors is recruited to  
220 the embryonic enthesis, co-populates it alongside *Sox9*+ progenitors and, eventually, replaces them  
221 during postnatal development.

222 As mentioned, fibrous and fibrocartilaginous entheses exhibit marked differences in structure and  
223 composition (Benjamin et al., 2002). Notwithstanding the importance of this distinction, the observed  
224 differences in cellular origin between stationary and migrating entheses calls for a revision of the  
225 traditional classification and suggests that it should be taken into account whether an enthesis is  
226 “migratory” or “stationary”.

227 Organ development can be mediated by several cellular mechanisms. In a linear mechanism, an  
228 embryonic set of progenitors forms a primordium and then continues to proliferate and differentiate to  
229 form the mature organ. Another mechanism is cell recruitment, during which cells are supplied to the  
230 forming organ after primordium establishment. A third mechanism involves template replacement, in  
231 which an initial template is formed by one type of cells to be later replaced by another cell population,  
232 which will form the mature organ. Interestingly, in the musculoskeletal system there are examples of all  
233 these modes of development. Muscles and joints develop through cell recruitment (Buckingham et al.,  
234 2003; Shwartz et al., 2016), whereas most of the skeleton develops through template replacement,  
235 namely by endochondral ossification (Kronenberg, 2003). Here, we show that stationary entheses  
236 develop linearly by embryonic *Sox9*+ progenitors that form the postnatal enthesis and later upregulate  
237 the expression of *Gli1*. However, we show that migrating entheses develop through template  
238 replacement, as *Gli1*+ progenitors replace the *Sox9*+ embryonic enthesis cells and form the mature  
239 enthesis.

240 Previous studies have shown not only that *Gli1* is a marker for the forming enthesis, but that the HH  
241 pathway plays an active role in regulating enthesis maturation and regeneration (Breidenbach et al.,  
242 2015; Dyment et al., 2015; Liu et al., 2013; Schwartz et al., 2015; Schwartz et al., 2017). *Ihh* expression  
243 was identified in proximity to *Gli1*<sup>+</sup> progenitor population in stationary entheses (Dyment et al., 2015;  
244 Liu et al., 2013; Schwartz et al., 2015). Moreover, loss-of-function of *Smo*, a component of the HH  
245 pathway, in *Scx*-expressing cells resulted in reduced mineralization of the enthesis (Breidenbach et al.,  
246 2015; Dyment et al., 2015; Liu et al., 2013; Schwartz et al., 2015). Yet, the question of which ligand of  
247 the HH pathway regulates the specification of *Gli1*<sup>+</sup> cells in the embryo and, specifically, in migrating  
248 entheses has remained open. Our results clearly suggest that *Gli1* expression is regulated by both SHH  
249 and IHH during enthesis development. In the embryo, we show that SHH, but not IHH, signaling is  
250 essential for *Gli1* expression in the enthesis, implicating SHH in *Gli1*<sup>+</sup> progenitor specification.  
251 However, during postnatal development, *Ihh* expression is vital for maintaining *Gli1* enthesis expression  
252 (Fig. 7A).

253 During endochondral ossification, IHH regulates hypertrophic chondrocyte differentiation and, thereby,  
254 bone elongation (Vortkamp et al., 1996). It is therefore possible that by controlling both these processes,  
255 IHH coordinates enthesis migration with the concurrent bone elongation to preserve enthesis position  
256 along the shaft. However, the signals that govern enthesis positioning and migration along the bone,  
257 including the possible effect of IHH on these processes, are yet to be elucidated.

258 Another key question regards the mechanism that facilitates the replacement between *Sox9*<sup>+</sup> and *Gli1*<sup>+</sup>  
259 cell populations. It is possible that the former cells die, while the latter cells proliferate and populate the  
260 entire enthesis. A more attractive hypothesis is that during enthesis drift, *Sox9*<sup>+</sup> cells are removed  
261 together with eroded bone tissue by osteoclasts or other phagocytic cells. However, the replacement



262 mechanism remains an open question. Moreover, whether the replacement process is the mechanism that  
263 allows migrating entheses to maintain their relative position along the bone is yet to be determined.  
264 Finally, our finding that *Gli1*-expressing cells are pre-determined already in the embryo suggests the  
265 existence of an earlier, yet unknown player in the specification of these progenitors. The discovery of  
266 this early marker gene may enable the identification of multipotent enthesis cells, which may hold  
267 therapeutic potential.

268 To conclude, our findings shed light on developmental linearity in organogenesis. Using the enthesis as  
269 a model system, we identify two different strategies of development (Fig. 7). The first, found in  
270 stationary entheses, is linear development where embryonic progenitors and their descendants contribute  
271 to the entire process of enthesis development, from embryogenesis to maturity. Conversely, in migrating  
272 entheses, another developmental strategy was identified where one type of progenitor cells form an  
273 embryonic template, only to be later replaced by another cell lineage that contributes to the mature  
274 organ.

275

## 276 **MATERIALS AND METHODS**

### 277 **Animals**

278 All experiments involving mice were approved by the Institutional Animal Care and Use Committee  
279 (IACUC) of the Weizmann Institute. Histology was performed on BL6 mice.

280 For lineage tracing experiments, *Sox9-Cre* (Akiyama et al., 2005), *Sox9-CreER* (Soeda et al., 2010) and  
281 *Gli1-CreER<sup>T2</sup>* (Ahn and Joyner, 2004, Jackson laboratories) mice were crossed with *R26R-tdTomato*  
282 mice (B6;129S6-*Gt(ROSA)26Sor<sup>tm9(CAG-tdTomato)Hze</sup>/J*, (Madisen et al., 2010) or with *R26R-Confetti* mice  
283 (B6.129P2-*Gt(ROSA)26Sor<sup>tm1(CAG-Brainbow2.1)Cle</sup>/J*, Snippert et al., 2010).

284 To create *Shh* KO mice, mice heterozygous for a mutation in *Shh* (B6.Cg-*Shh*<sup>tm1(EGFP/cre)Cjt</sup>/J; Jackson  
285 Laboratory) were intercrossed; heterozygotes or WT littermates were used as a control. The generation  
286 of *Prx1-Cre* (Logan et al., 2002) was previously described. To generate *Prx1-Cre-Ihh* mutant mice, *Ihh*-  
287 floxed mice (B6N;129S4-*Ihh*<sup>tm1Blan</sup>/J; Jackson Laboratory) (Razzaque et al., 2005) were mated with  
288 *Prx1-Cre* mice. As a control, *Prx1-Cre*-negative animals were used.

289 For cell lineage experiments, *Sox9-CreER*<sup>T2/+</sup> or *Gli1-CreER*<sup>T2/+</sup> males were crossed with *R26R-*  
290 *tdTomato* females to produce embryos carrying both the relevant *CreER*<sup>T2</sup> and *R26R-tdTomato* alleles.

291 For fate mapping, *Gli1-CreER*<sup>T2/+</sup> males were crossed with *R26R-Confetti* females to produce embryos  
292 carrying both the *Gli1-CreER*<sup>T2</sup> and *Confetti* alleles.

293 In all timed pregnancies, plug date was defined as E0.5. For harvesting of embryos, timed-pregnant  
294 females were sacrificed by cervical dislocation. The gravid uterus was dissected out and suspended in a  
295 bath of cold phosphate-buffered saline (PBS) and the embryos were harvested after removal of amnion  
296 and placenta. Tail genomic DNA was used for genotyping.

297

### 298 **Histological analysis, in situ hybridization and immunofluorescence**

299 For histology and *in situ* hybridization, embryos were harvested at various ages, dissected, and fixed in  
300 4% paraformaldehyde (PFA)/PBS at 4°C overnight. After fixation, tissues were dehydrated to 70%  
301 EtOH and embedded in paraffin. The embedded tissues were cut to generate 7-µm-thick sections and  
302 mounted onto slides. Hematoxylin and eosin (H&E) staining was performed following standard  
303 protocols. Non-fluorescent and fluorescent *in situ* hybridizations were performed as previously  
304 described using digoxigenin- (DIG) labeled probes (Shwartz and Zelzer, 2014). All probes are available  
305 upon request.

306 For immunofluorescence staining, 10- $\mu$ m-thick cryosections were air-dried for 1 hour before staining.  
307 For IHH staining, sections were washed twice in PBST for 5 minutes and blocked to prevent non-  
308 specific binding with 7% goat serum and 1% BSA dissolved in PBST. Then, sections were incubated  
309 with rabbit anti-IHH antibody (Abcam, #AB39364, 1:50) at 4C<sup>o</sup> overnight. The next day, sections were  
310 washed twice with PBST and incubated for 1 hour with Cy2 conjugated fluorescent antibody (1:100,  
311 Jackson Laboratories). Slides were mounted with Immuno-mount aqueous-based mounting medium  
312 (Thermo).

313 For Gli1 staining, 10- $\mu$ m-thick cryosections were air dried for 1 hour and fixed in 4% PFA for 10  
314 minutes. Then, sections were washed twice in PBST and endogenous peroxidase was quenched using  
315 3% H<sub>2</sub>O<sub>2</sub> in PBS. Next, antigen retrieval was preformed using 0.3% Triton in PBS. Non-specific binding  
316 was blocked using 7% horse serum and 1% BSA dissolved in PBST for 1 hour. Then, sections were  
317 incubated with Goat anti-GLI1 antibody (R&D systems, #AF3455, 1:100) overnight at room  
318 temperature. The next day, sections were washed twice in PBST and incubated with Biotin anti-goat  
319 (1:100, Jackson laboratories, 705065147) for 1 hour and then with streptavidin-HRP (1:200 Perkin  
320 Elmer, NEL750001EA) for 1 hour. HRP was developed using TSA amplification kit (1:100, Prekin  
321 Elmer) for 20 minutes, counterstained with DAPI and mounted with Immuno-mount aqueous- based  
322 mounting medium (Thermo).

323

### 324 **Physical position of entheses**

325 For identification of enthesis physical position, 2-4 limb samples at stages E16.5-P14 were scanned *ex*  
326 *vivo* using iodine contrast agent to allow visualization of the soft tissue. DT and TM positions were  
327 identified manually, and their physical position along the bone was calculated as described previously  
328 (Stern et al., 2015).

329

### 330 **Cell lineage analysis**

331 Tamoxifen (Sigma T-5648) was dissolved in corn oil (Sigma C-8267) at a final concentration of 5  
332 mg/ml. Time-mated *R26R-tdTomato* females were administered 1 mg of tamoxifen by oral gavage  
333 (FST) at designated time points as indicated.

334

### 335 **Cell count**

336 For each age, 2-4 limbs from different litters were harvested, embedded in OCT, and sectioned at a  
337 thickness of 10  $\mu$ m. Sections were imaged using Zeiss LSM 780 microscope approximately every 80  
338  $\mu$ m, capturing red and DAPI channels. Images were then processed in ImageJ as follows: Each image  
339 was converted to an RGB stack and the region of interest was manually identified and cropped. Then,  
340 image levels were adjusted to improve separation between nuclei. A binary threshold was set  
341 automatically and conjoined nuclei were automatically separated using the binary watershed function.  
342 Using a home-made Matlab script, the number of nuclei was counted. Each nucleus that was co-  
343 localized with a red channel signal was counted as a tdTomato-positive cell. For each section, the  
344 percentage of tdTomato-positive cells was calculated. The average percentage of these cells was  
345 calculated first for each bone and then for all samples. From each line and for each age group, at least 3  
346 individual bones were sampled, and 9-17 sections per bone were analyzed, depending on bone length.  
347 Data are presented as mean  $\pm$  SD.

348

### 349 **Fate mapping Confetti experiment**

350 Tamoxifen (Sigma T-5648) was dissolved in corn oil (Sigma C-8267) at a final concentration of 20  
351 mg/ml. Time-mated *R26R-Confetti* females were administered 4 mg of tamoxifen by oral gavage at

352 E13.5. Cre-positive pups were sacrificed at P14. 1 hour prior to sacrifice, each pup was injected with  
353 Calcein blue (Sigma, #m1255; 30 mg/kg). Limbs were harvested, fixed for 30 minutes in 4% PFA at  
354 4°C, embedded in OCT, and sectioned at a thickness of 10 µm. Sections were imaged using Zeiss LSM  
355 780 microscope approximately every 80 µm.

356

### 357 **Microscope settings and image analysis**

358 At least 1024X1024 pixels, 8-bit images were acquired using the X20 lens. A Z-stack of 2-4 images was  
359 taken from each section. To detect GFP and YFP, the argon laser 488 nm was used. For RFP detection, a  
360 red diode laser emitting at 561 nm was used, and blue mCFP was excited using a laser line at 458 nm.  
361 Calcein blue staining was detected using the 405-nm laser line. GFP fluorescence was collected between  
362 ~500-598 nm, airy 1; RFP fluorescence was collected between ~606-654nm, airy 1; mCFP fluorescence  
363 was collected between ~464-500 nm, airy 1 and Calcein blue was collected between ~410-451. For each  
364 image, a corresponding bright field image was captured. The acquired images were processed using  
365 Photoshop and ImageJ.

366 To calculate the percentage of *Gli1*<sup>+</sup> clones found in both mineralized and non-mineralized  
367 fibrocartilage, the border between the zones was identified by Calcein blue signal. Clones that crossed  
368 the mineral border were manually counted and their percentage was calculated first for each section,  
369 then for each limb and, finally, for each type of enthesis. Data are presented as mean ± SD.

370

### 371 **Acknowledgments**

372 We thank Nitzan Konstantin for expert editorial assistance. We thank Dr. Patrick Tschopp from the  
373 Clifford J. Tabin lab, Harvard Medical School, for his assistance in generating *Shh* KO mice. Special  
374 thanks to all members of the Zelzer laboratory for encouragement and advice.

375 This study was supported by grants from the National Institutes of Health (grant #R01 AR055580),  
376 European Research Council (ERC) (grant #310098), the Jeanne and Joseph Nissim Foundation for Life  
377 Sciences Research, the Y. Leon Benozio Institute for Molecular Medicine, Beth Rom-Rymer, the  
378 Estate of David Levinson, the Jaffe Bernard and Audrey Foundation, Georges Lustgarten Cancer  
379 Research Fund, the David and Fela Shapell Family Center for Genetic Disorders, the David and Fela  
380 Shapell Family Foundation INCPM Fund for Preclinical Studies, and the Estate of Bernard Bishin for  
381 the WIS-Clalit Program.

382

383 **REFERENCES**

- 384 **Ahn, S. and Joyner, A. L.** (2004). Dynamic changes in the response of cells to positive hedgehog  
385 signaling during mouse limb patterning. *Cell* **118**, 505–16.
- 386 **Akiyama, H., Kim, J.-E., Nakashima, K., Balmes, G., Iwai, N., Deng, J. M., Zhang, Z., Martin, J.**  
387 **F., Behringer, R. R., Nakamura, T., et al.** (2005). Osteo-chondroprogenitor cells are derived from  
388 Sox9 expressing precursors. *Proc. Natl. Acad. Sci. U. S. A.* **102**, 14665–70.
- 389 **Benjamin, M. and McGonagle, D.** (2009). Entheses: tendon and ligament attachment sites. *Scand. J.*  
390 *Med. Sci. Sports* **19**, 520–7.
- 391 **Benjamin, M., Kumai, T., Milz, S., Boszczyk, B. M., Boszczyk, a a and Ralphs, J. R.** (2002). The  
392 skeletal attachment of tendons--tendon “entheses”. *Comp. Biochem. Physiol. A. Mol. Integr.*  
393 *Physiol.* **133**, 931–45.
- 394 **Benjamin, M., Toumi, H., Ralphs, J. R., Bydder, G., Best, T. M. and Milz, S.** (2006). Where tendons  
395 and ligaments meet bone: attachment sites (‘entheses’) in relation to exercise and/or mechanical  
396 load. *J. Anat.* **208**, 471–90.
- 397 **Blitz, E., Sharir, A., Akiyama, H. and Zelzer, E.** (2013). Tendon-bone attachment unit is formed  
398 modularly by a distinct pool of Scx- and Sox9-positive progenitors. *Development* **140**, 2680–90.
- 399 **Breidenbach, A. P., Aschbacher-Smith, L., Lu, Y., Dymont, N. a., Liu, C.-F., Liu, H., Wylie, C.,**  
400 **Rao, M., Shearn, J. T., Rowe, D. W., et al.** (2015). Ablating Hedgehog Signaling in Tenocytes  
401 During Development Impairs Biomechanics and Matrix Organization of the Adult Murine Patellar  
402 Tendon Enthesis. *J. Orthop. Res.* n/a-n/a.
- 403 **Buckingham, M., Bajard, L., Chang, T., Daubas, P., Hadchouel, J., Meilhac, S., Montarras, D.,**  
404 **Rocancourt, D. and Relaix, F.** (2003). The formation of skeletal muscle: From somite to limb. *J.*  
405 *Anat.* **202**, 59–68.

- 406 **Dörfl, J.** (1980a). Migration of tendinous insertions. I. Cause and mechanism. *J. Anat.* **131**, 179–95.
- 407 **Dörfl, J.** (1980b). Migration of tendinous insertions. II. Experimental modifications. *J. Anat.* **131**, 229–
- 408 37.
- 409 **Doschak, M. R. and Zernicke, R. F.** (2005). Structure, function and adaptation of bone-tendon and
- 410 bone-ligament complexes. *J. Musculoskelet. Neuronal Interact.* **5**, 35–40.
- 411 **Dyment, N. A., Breidenbach, A. P., Schwartz, A. G., Russell, R. P., Aschbacher-Smith, L., Liu, H.,**
- 412 **Hagiwara, Y., Jiang, R., Thomopoulos, S., Butler, D. L., et al.** (2015). Gdf5 progenitors give rise
- 413 to fibrocartilage cells that mineralize via hedgehog signaling to form the zonal enthesis. *Dev. Biol.*
- 414 **405**, 1–12.
- 415 **Galatz, L., Rothermich, S., VanderPloeg, K., Petersen, B., Sandell, L. and Thomopoulos, S.** (2007).
- 416 Development of the supraspinatus tendon-to-bone insertion: localized expression of extracellular
- 417 matrix and growth factor genes. *J. Orthop. Res.* **25**, 1621–8.
- 418 **Harfe, B. D., Scherz, P. J., Nissim, S., Tian, H., McMahon, A. P. and Tabin, C. J.** (2004). Evidence
- 419 for an expansion-based temporal Shh gradient in specifying vertebrate digit identities. *Cell* **118**,
- 420 517–528.
- 421 **Kronenberg, H. M.** (2003). Developmental regulation of the growth plate. *Nature* **423**, 332–6.
- 422 **Liu, C.-F., Aschbacher-Smith, L., Barthelery, N. J., Dyment, N., Butler, D. and Wylie, C.** (2012).
- 423 Spatial and Temporal Expression of Molecular Markers and Cell Signals During Normal
- 424 Development of the Mouse Patellar Tendon. *Tissue Eng. Part A* **18**, 598–608.
- 425 **Liu, C.-F., Breidenbach, A., Aschbacher-Smith, L., Butler, D. and Wylie, C.** (2013). A Role for
- 426 Hedgehog Signaling in the Differentiation of the Insertion Site of the Patellar Tendon in the Mouse.
- 427 *PLoS One* **8**, e65411.
- 428 **Madisen, L., Zwingman, T. A., Sunkin, S. M., Oh, S. W., Zariwala, H. A., Gu, H., Ng, L. L.,**



- 429 **Palmiter, R. D., Hawrylycz, M. J., Jones, A. R., et al.** (2010). A robust and high-throughput Cre  
430 reporting and characterization system for the whole mouse brain. *Nat. Neurosci.* **13**, 133–140.
- 431 **Polly, P. D.** (2007). Limbs in Mammalian Evolution. *Fins into Limbs Evol. Dev. Transform.* 245–268.
- 432 **Razzaque, M. S., Soegiarto, D. W., Chang, D., Long, F. and Lanske, B.** (2005). Conditional deletion  
433 of Indian hedgehog from collagen type 2 $\alpha$ 1-expressing cells results in abnormal endochondral bone  
434 formation. *J. Pathol.* **207**, 453–461.
- 435 **Salton, J. A. and Sargis, E. J.** (2009). Evolutionary morphology of the tenrecoidea (Mammalia)  
436 hindlimb skeleton. *J. Morphol.* **270**, 367–387.
- 437 **Schwartz, a G., Long, F. and Thomopoulos, S.** (2015). Enthesis fibrocartilage cells originate from a  
438 population of Hedgehog-responsive cells modulated by the loading environment. *Development* **142**,  
439 196–206.
- 440 **Schwartz, A. G., Galatz, L. M. and Thomopoulos, S.** (2017). Enthesis regeneration: a role for Gli1+  
441 progenitor cells. *Development* **144**, 1159–1164.
- 442 **Schweitzer, R., Chyung, J. H., Murtaugh, L. C., Brent, a E., Rosen, V., Olson, E. N., Lassar, a  
443 and Tabin, C. J.** (2001). Analysis of the tendon cell fate using Scleraxis, a specific marker for  
444 tendons and ligaments. *Development* **128**, 3855–66.
- 445 **Shaw, H. M. and Benjamin, M.** (2007). Structure-function relationships of entheses in relation to  
446 mechanical load and exercise. *Scand. J. Med. Sci. Sports* **17**, 303–15.
- 447 **Shwartz, Y. and Zelzer, E.** (2014). Nonradioactive in situ hybridization on skeletal tissue sections.  
448 *Methods Mol. Biol.* **1130**, 203–215.
- 449 **Shwartz, Y., Viukov, S., Krief, S. and Zelzer, E.** (2016). Joint Development Involves a Continuous  
450 Influx of Gdf5-Positive Cells. *Cell Rep.* **15**, 2577–2587.
- 451 **Snippert, H. J., van der Flier, L. G., Sato, T., van Es, J. H., van den Born, M., Kroon-Veenboer,**

452 **C., Barker, N., Klein, A. M., van Rheenen, J., Simons, B. D., et al.** (2010). Intestinal Crypt  
453 Homeostasis Results from Neutral Competition between Symmetrically Dividing Lgr5 Stem Cells.  
454 *Cell* **143**, 134–144.

455 **Soeda, T., Deng, J. M., de Crombrughe, B., Behringer, R. R., Nakamura, T. and Akiyama, H.**  
456 (2010). Sox9-expressing precursors are the cellular origin of the cruciate ligament of the knee joint  
457 and the limb tendons. *Genesis* **48**, 635–44.

458 **Stern, T., Aviram, R., Rot, C., Galili, T., Sharir, A., Kalish Achrai, N., Keller, Y., Shahar, R. and**  
459 **Zelzer, E.** (2015). Isometric Scaling in Developing Long Bones Is Achieved by an Optimal  
460 Epiphyseal Growth Balance. *PLOS Biol.* **13**, e1002212.

461 **Sugimoto, Y., Takimoto, A., Akiyama, H., Kist, R., Scherer, G., Nakamura, T., Hiraki, Y. and**  
462 **Shukunami, C.** (2013). Scx+/Sox9+ progenitors contribute to the establishment of the junction  
463 between cartilage and tendon/ligament. *Development* **140**, 2280–8.

464 **Vortkamp, A., Lee, K., Lanske, B., Segre, G. V., Kronenberg, H. M. and Tabin, C. J.** (1996).  
465 Regulation of Rate of Cartilage Differentiation by Indian Hedgehog and PTH-Related Protein.  
466 *Science (80-. ).* **273**, 613–622.

467 **Wang, M., Vanhouten, J. N., Nasiri, A. R., Johnson, R. L. and Broadus, A. E.** (2013). PTHrP  
468 regulates the modeling of cortical bone surfaces at fibrous insertion sites during growth. *J. Bone*  
469 *Miner. Res.* **28**, 598–607.

470

**Fig.1**

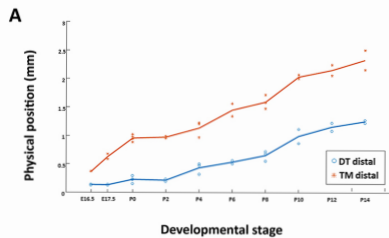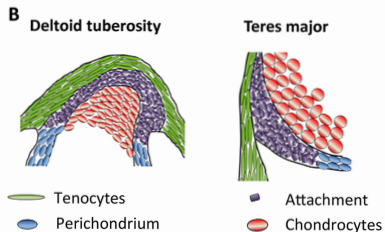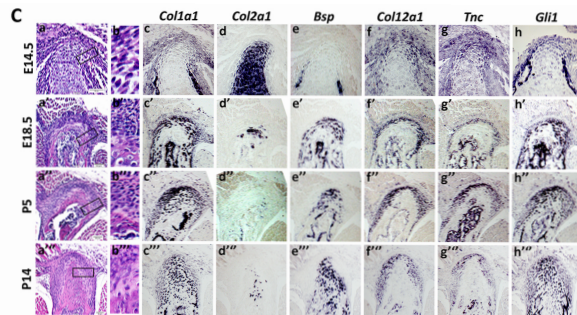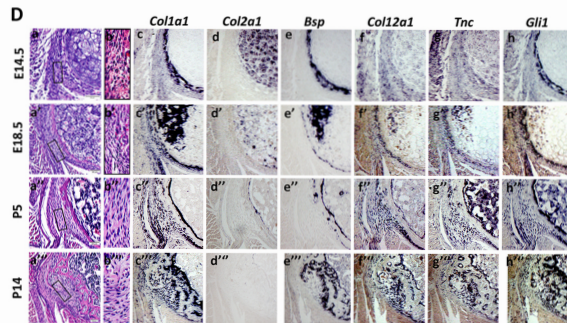

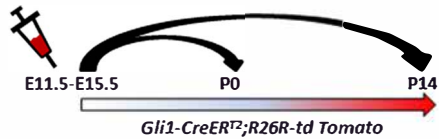

Fig.2

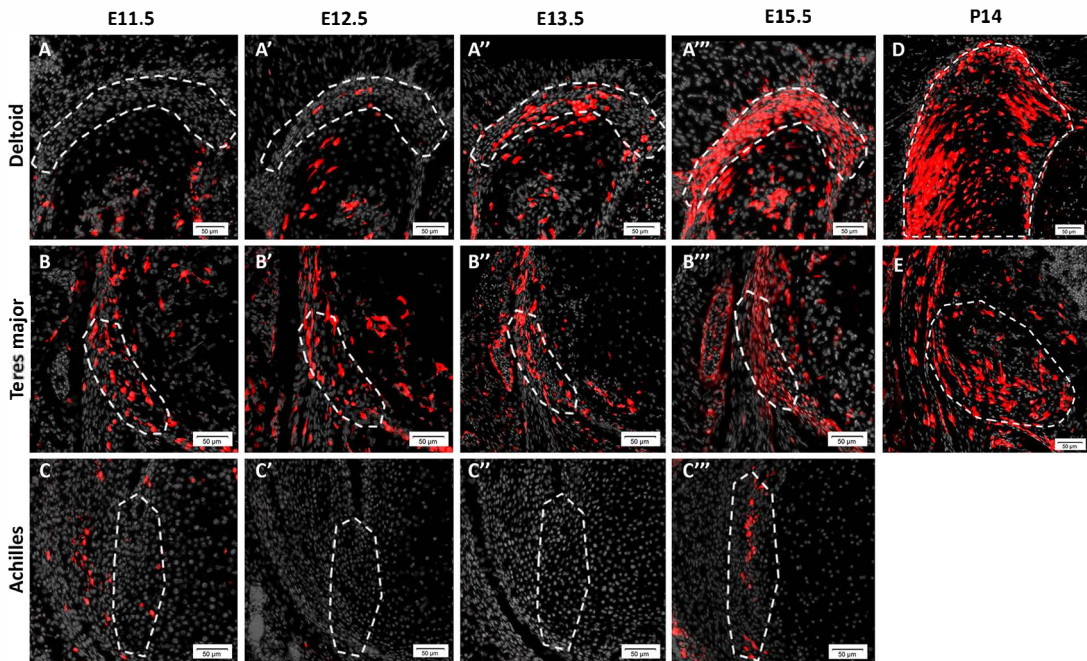

**Fig.3**

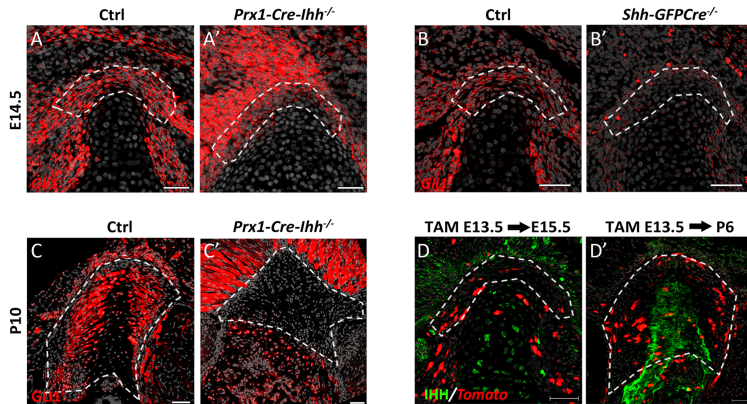



**Fig.4**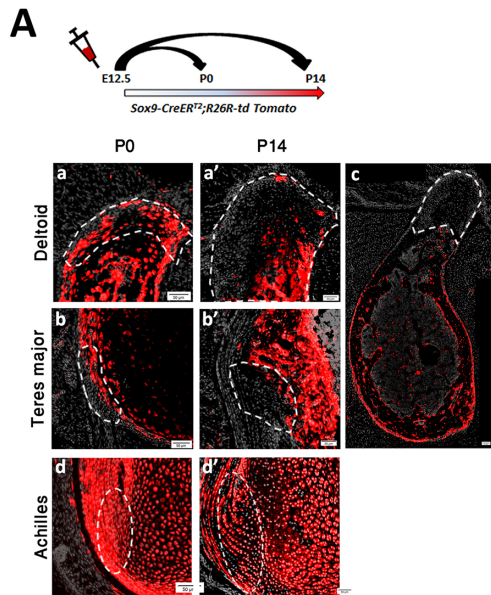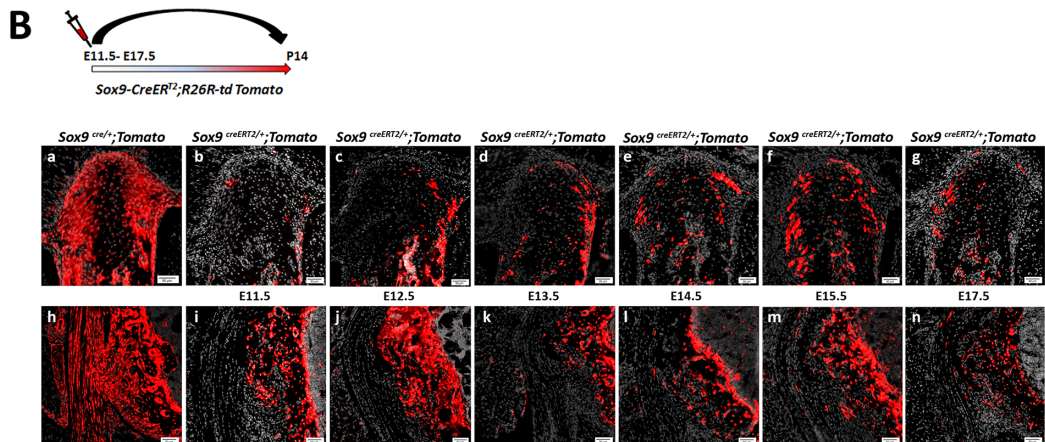

**Fig.5**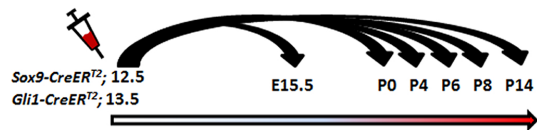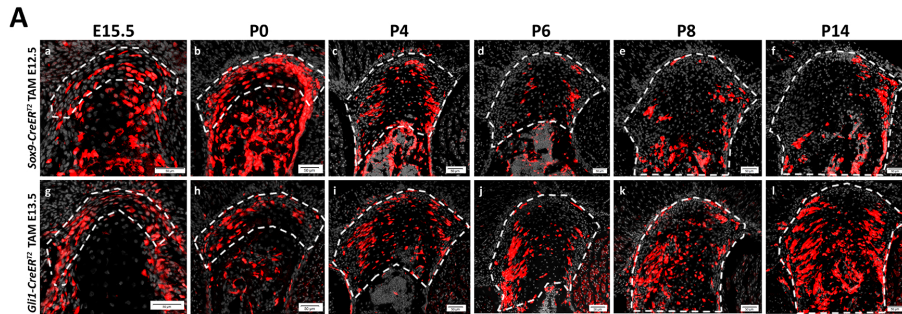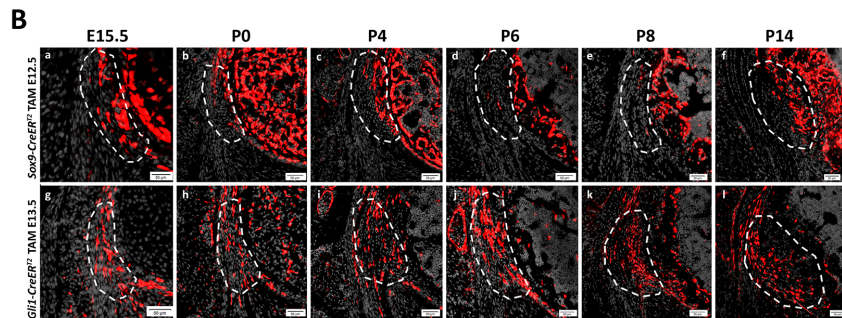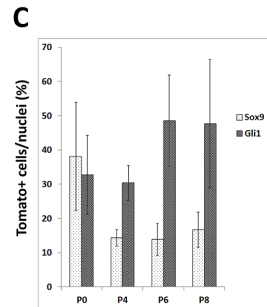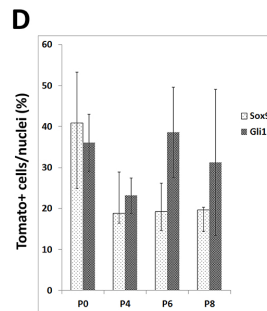

# Fig.6

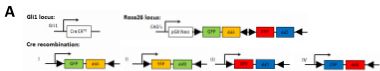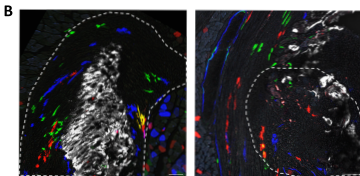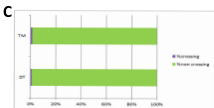



**Fig.7**

**A. Migratory entheses**

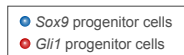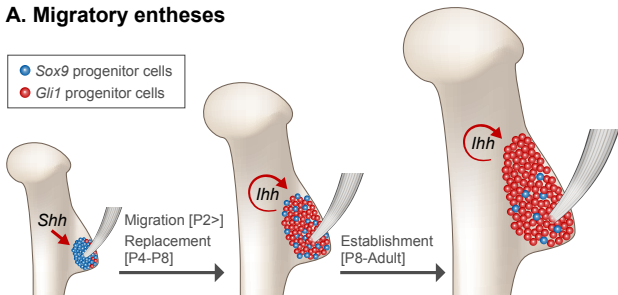

**B. Stationary entheses**

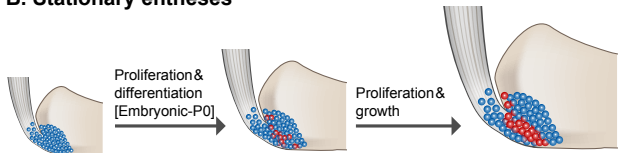

471 **FIGURE LEGENDS**

472 **Figure 1. Some entheses undergo cellular and morphological changes while migrating.** (A) Graph  
473 showing the physical position of the deltoid tuberosity (DT) and teres major (TM) entheses along the  
474 bone throughout development (E16.5-P14), defined as the distance of the element (mm) from a  
475 predefined longitudinal origin roughly at the center of the shaft. Positive and negative values correspond  
476 to elements that are proximal and distal to the point of origin, respectively. As indicated by the steep  
477 slope of the curves, both DT and TM migrate considerably through development. (B) Schematic  
478 illustrations of the embryonic DT and TM entheses. (C and D) Transverse sections through the humerus  
479 showing the DT (A) and TM (B) entheses of E14.5-P14 WT mice. [C(a,b) and D(a,b)]: H&E staining.  
480 C(b) and D(b) are magnifications of the boxed areas in C(a) and D(a), respectively. [C(c-h) and D(c-  
481 h)]: *In situ* hybridization using digoxigenin-labeled, anti-sense complementary RNA probes for *Colla1*,  
482 *Col2a1*, *Bsp*, *Coll2a1*, *Tnc* and *Gli1* at E14.5 (c-h), E18.5 (c'-h'), P5 (c''-h'') and P14 (c'''-h'''). Scale  
483 bars: 50  $\mu$ m.

484 **Figure 2. *Gli1*+ cell lineage contributes to the postnatal enthesis.** Pulse-chase cell lineage  
485 experiments using *Gli1-CreER<sup>T2</sup>;R26R-tdTomato* mice demonstrate the contribution of *Gli1* lineage  
486 cells to various entheses. *Gli1*-positive cells were pulsed by a single tamoxifen administration at  
487 different time points (E11.5-E15.5) and their descendants were followed to P0 and P14. (A-A''') The  
488 DT enthesis was extensively marked after tamoxifen administration at E13.5 and E15.5. (B-B''')  
489 tdTomato-positive cells were identified in the TM enthesis regardless of the time of pulsing; however, a  
490 stronger signal was seen following tamoxifen administration at E13.5 or later. (C-C''') tdTomato-  
491 positive cells were identified in the Achilles tendon enthesis following tamoxifen administration at  
492 E15.5. (D-E) Both DT and TM entheses were extensively marked at P14 following tamoxifen  
493 administration at E13.5. The enthesis is demarcated by a dashed line. Scale bars: 50  $\mu$ m.

494 **Figure 3. *Gli1* expression in migrating entheses is initiated by SHH and maintained by IHH.**  
495 **(A,A')** Fluorescent ISH for *Gli1* on sections through the DT of E14.5 control (A) and *Prx1-Cre-Ihh<sup>ff</sup>*  
496 embryos (A') demonstrates that in the absence of IHH signaling, *Gli1* expression in the enthesis is  
497 unchanged. **(B,B')** Fluorescent ISH for *Gli1* on sections through the DT of E14.5 control (B) and  
498 *Shh<sup>Cre/Cre</sup>* embryos (B') demonstrates that in the absence of SHH signaling, *Gli1* expression in the  
499 enthesis is lost. **(C,C')** Immunostaining for GLI1 protein in *Prx1-Cre-Ihh<sup>ff</sup>* mutant (C') and control (C)  
500 DT sections shows that in the absence of IHH, GLI1 protein expression is lost from the DT enthesis.  
501 **(D,D')** Immunostaining for IHH protein on *Gli1-CreER<sup>T2</sup>;R26R-tdTomato* mice. Tamoxifen was  
502 administered at E13.5 and mice were sacrificed at E15.5 (D) or P6 (D'). IHH expression is seen in  
503 hypertrophic chondrocytes at E15.5 and in the mineralizing part of the enthesis at P6. Enthesis is  
504 demarcated by a dashed line. Scale bars: 50  $\mu$ m.

505 **Figure 4. *Sox9* lineage cells of the embryonic enthesis do not contribute to postnatal migrating**  
506 **entheses.** **(A)** Pulse-chase cell lineage experiment using *Sox9-CreER<sup>T2</sup>;R26R-td Tomato* mice  
507 demonstrates that *Sox9* lineage contributes differently to migrating and stationary entheses. *Sox9*-  
508 positive cells were marked at E12.5 by a single tamoxifen administration. At P0, tdTomato-positive cells  
509 were identified in migrating DT and TM entheses (A(a,b)) as well as in stationary Achilles entheses  
510 (A(d)). At P14, only a few tdTomato-positive cells were identified in migrating entheses (A(a',b',c)),  
511 whereas extensive staining was still seen in stationary entheses (A(d')). Enthesis is demarcated by a  
512 dashed line. Scale bars: 50  $\mu$ m. **(B)** The contribution of *Sox9* lineage to the DT and TM entheses was  
513 evaluated by crossing *Sox9-Cre* or *Sox9-CreER<sup>T2</sup>* mice with *R26R-tdTomato* reporter mice. (Ba,h): The  
514 total contribution of the lineage was evaluated by examination of *Sox9-Cre;R26R-tdTomato* mice at P14.  
515 (Bb-g,i-n): The relative contribution of *Sox9* lineage cells specified at different time points was

516 evaluated by pulse-chase experiments on *Sox9-CreER<sup>T2</sup>;R26R-tdTomato* mice, in which a single dose of  
517 tamoxifen was administered at various stages from E11.5 through E17.5.

518 **Figure 5. *Gli1* lineage cells replace *Sox9* lineage cells during entheses maturation. (A,B)** *Sox9-*  
519 *CreER<sup>T2</sup>;R26R-tdTomato* and *Gli1-CreER<sup>T2</sup>;R26R-tdTomato* mice were labeled by tamoxifen  
520 administration at E12.5 and E13.5, respectively and sacrificed at E15.5-P14. Transverse sections  
521 through the DT (A) and TM (B) show an increase in *Sox9* lineage cells at E15.5-P0. Between P0 and  
522 P14, a continuous decrease in *Sox9* lineage cells is seen. Concurrently, *Gli1* lineage cell number  
523 gradually increased in both DT and TM entheses. By P8, both entheses were populated by *Gli1* lineage  
524 cells. Enthesis is demarcated by a dashed line. Scale bars: 50  $\mu$ m. **(C,D)** Graphs showing the percentage  
525 of *Gli1*-tdTomato and *Sox9*-tdTomato positive cells in P0, P4, P6, and P8 DT (C) and TM (D) cells.

526 **Figure 6. Cell fate of *Gli1*+ entheses progenitors is pre-determined.** Pulse-chase cell lineage  
527 experiments using *Gli1-CreER<sup>T2</sup>;R26R-Confetti* mice, in which *Gli1*+ progenitor cell clones were  
528 labeled. *Gli1*-positive cells were pulsed by a single tamoxifen administration at E13.5 and their  
529 descendants were followed to P14. One hour prior to sacrifice, mice were injected with Calcein blue.  
530 **(A)** Schematic illustration of possible Cre recombination outcomes. **(B)** Multiple clones were identified  
531 in the DT entheses; however, the clones were restricted to either fibrocartilage or mineral fibrocartilage  
532 and did not cross the border between the layers. The clones identified in the TM entheses were restricted  
533 to the fibrous part and did not penetrate the bone. **(C)** Graph showing the percentage of crossing vs. non-  
534 crossing clones. Scale bars: 50  $\mu$ m.

535 **Figure 7. Migrating entheses develop through template replacement.** Schematic illustration of the  
536 developmental sequence of migratory and stationary entheses. During embryogenesis, *Sox9* lineage cells  
537 form an entheses template. **(A)** In migrating entheses, *Sox9* lineage cells are replaced by a second  
538 population of *Gli1* lineage cells, which eventually form the mature entheses. Specification of *Gli1*

539 lineage is regulated by SHH, whereas maintenance of this population is regulated by IHH. (B) In  
540 stationary entheses, embryonic *Sox9* lineage cells proliferate and differentiate and, eventually, populate  
541 the postnatal enthesis structure. During late embryonic development, some *Sox9* lineage cells start  
542 expressing *Gli1*.

543

544
